# Supplementary material for: The co-regulator dNAB interacts with Brinker to eliminate cells with reduced Dpp signaling
Source: Oxford University Press journal article supplement (doi:10.1242/dev.032383), 2009-03-06
Supplement: dev032383-sup-032383-figs1.pdf [file dev032383-sup-032383-figs1.pdf]

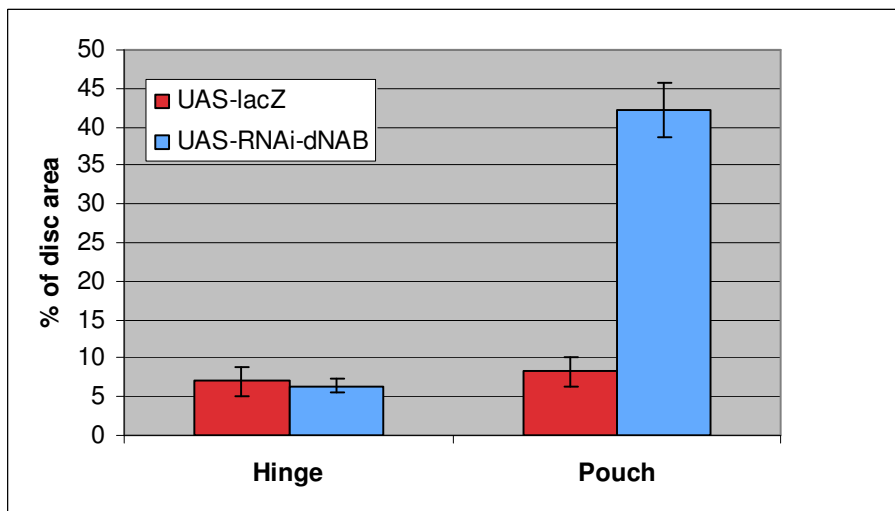

| UAS-lacZ | Hinge | Pouch | UAS-RNAi-dNAB | Hinge | Pouch |
|----------|-------|-------|---------------|-------|-------|
| Disc 1   | 15    | 15    | Disc 1        | 5     | 45    |
| Disc 2   | 10    | 5     | Disc 2        | 10    | 50    |
| Disc 3   | 10    | 15    | Disc 3        | 5     | 40    |
| Disc 4   | 5     | 10    | Disc 4        | 5     | 30    |
| Disc 5   | 1     | 5     | Disc 5        | 5     | 45    |
| Disc 6   | 1     | 5     | Disc 6        | 10    | 30    |
| Disc 7   | 7     | 3     | Disc 7        | 5     | 55    |
| Average  | 7.0   | 8.3   | Average       | 6.4   | 42.1  |
| Error    | 1.9   | 1.9   | Error         | 0.9   | 3.6   |
